# Supplementary material for: Sexual dimorphism in synaptic inputs to the mouse amygdala and orbital cortex
Source: Front Neurosci. 2023 Oct 12;17:1258284. doi: 10.3389/fnins.2023.1258284 (PMC10601666; doi:10.3389/fnins.2023.1258284)
Supplement: Supplementary file 2 [file Table_1.xlsx]

## Sheet: Statistic_results_01-May-2023
S1 Table. Brain region abbreviations and statistics			higher in:	male	female
MEA whole brain starters using rank-sum (p-value)
Brain_region	Abbreviation	p value (PPS)
Medial amygdalar nucleus	MEA	0.2739
Isocortex	Isocortex	0.4615
Olfactory	OLF	1
Hippocampal formation	HPF	0.4615
Cortical subplate	CTXsp	0.2739
Striatum	STR	0.9172
Pallidum	PAL	0.1923
Thalamus	TH	1
Hypothalamus	HY	0.1026
Midbrain	MB	1
Hindbrain	HB	1
MEA amygdala sub region starters using rank-sum (p-value)
Brain_region	Abbreviation	p value (PPS)
Cortical amygdala	Cortical Amy	0.1923
Subplate amygdala	Subplate Amy	0.8368
Striatial amygdala	Striatial Amy	0.1055
MEA inputs (PPS, FPR), using rank-sum (p-value) and FDR 5% (q-value)
Brain_region	Abbreviation	p value (PPS)	q value (PPS)	p value (FPR)	q value (FPR)
Anterior amygdalar area	AAA	0.0262238	0.0461177	0.534965	0.757867
Nucleus accumbens	ACB	0.0378788	0.0623167	1	1
Anterior hypothalamic nucleus	AHN	0.002331	0.00990676	0.208625	0.48363
Agranular insular area	AI	0.317599	0.344629	0.0728438	0.33773
Arcuate hypothalamic nucleus	ARH	0.00641026	0.0162111	0.0174825	0.111451
Anteroventral periventricular nucleus	AVPV	0.041958	0.0668706	0.272145	0.578307
Basolateral amygdalar nucleus anterior part	BLAa	0.00407925	0.0138695	0.0530303	0.270454
Basolateral amygdalar nucleus posterior part	BLAp	0.0151515	0.0335968	0.534965	0.757867
Basolateral amygdalar nucleus ventral part	BLAv	0.592075	0.616241	0.51049	0.757867
Basomedial amygdalar nucleus anterior part	BMAa	0.0973193	0.127264	0.534965	0.757867
Basomedial amygdalar nucleus posterior part	BMAp	0.0728438	0.100406	1	1
Bed nuclei of the stria terminalis	BST	0.0011655	0.00849151	0.000582751	0.0297203
Central amygdalar nucleus	CEA	0.00699301	0.0162111	0.804779	0.977231
Cortical amygdalar area	COA	0.194639	0.224553	0.804779	0.977231
Caudoputamen	CP	0.128205	0.155678	0.901515	0.999506
Dorsomedial nucleus of the hypothalamus	DMH	0.002331	0.00990676	0.164918	0.467269
Endopiriform nucleus dorsal part	EPd	0.025641	0.0461177	0.208625	0.48363
Fundus of striatum	FS	0.016317	0.0342926	0.710373	0.905725
Globus pallidus external segment	GPe	0.0728438	0.100406	0.0973193	0.354521
Globus pallidus internal segment	GPi	0.002331	0.00990676	0.128205	0.435897
Hippocampal region	HIP	0.128205	0.155678	0.259324	0.575023
Intercalated amygdalar nucleus	IA	0.00699301	0.0162111	0.317599	0.622983
Intralaminar nuclei of the dorsal thalamus	ILM	0.128205	0.155678	0.164918	0.467269
Lateral amygdalar nucleus	LA	0.0262238	0.0461177	0.534965	0.757867
Lateral group of the dorsal thalamus	LAT	0.208625	0.231301	1	1
Lateral hypothalamic area	LHA	0.00699301	0.0162111	0.455711	0.757867
Lateral preoptic area	LPO	0.00407925	0.0138695	0.00699301	0.0713287
Lateral septal nucleus	LS	0.000582751	0.00849151	0.0011655	0.0297203
Magnocellular nucleus	MA	0.00699301	0.0162111	0.382867	0.697365
Medial amygdalar nucleus	MEA	0.00407925	0.0138695
Medial preoptic nucleus	MPN	0.000582751	0.00849151	0.00699301	0.0713287
Medial preoptic area	MPO	0.0011655	0.00849151	0.002331	0.039627
Medial septal complex	MSC	0.002331	0.00990676	0.0110723	0.0806693
Midline group of the dorsal thalamus	MTN	0.00699301	0.0162111	0.208625	0.48363
Nucleus of the lateral olfactory tract	NLOT	0.0174825	0.0342926	0.164918	0.467269
Posterior amygdalar nucleus	PA	0.0699301	0.100406	0.620047	0.832168
Piriform-amygdalar area	PAA	0.772727	0.788182	0.455711	0.757867
Posterior hypothalamic nucleus	PH	0.0378788	0.0623167	0.710373	0.905725
Piriform area	PIR	0.901515	0.901515	0.208625	0.48363
Parasubthalamic nucleus	PSTN	0.382867	0.406796	0.534965	0.757867
Paraventricular hypothalamic nucleus	PVH	0.0530303	0.0795455	0.901515	0.999506
Perifornical nucleus	PeF	0.0011655	0.00849151	0.0262238	0.148601
Retrohippocampal region	RHP	0.0530303	0.0795455	0.620047	0.832168
Substantia innominata	SI	0.002331	0.00990676	0.0973193	0.354521
Somatosensory areas	SS	0.00641026	0.0162111	1	1
Postpiriform transition area	TR	0.198135	0.224553	0.869464	0.999506
Tuberal nucleus	TU	0.000582751	0.00849151	0.0973193	0.354521
Ventral group of the dorsal thalamus	VENT	0.0973193	0.127264	0.901515	0.999506
Visual areas	VIS	0.0168998	0.0342926	0.301282	0.614615
Ventromedial hypothalamic nucleus	VMH	0.0011655	0.00849151	0.0110723	0.0806693
Zona incerta	ZI	0.164918	0.195601	0.382867	0.697365
MEA inputs from meta-areas (PPS, FPR), using rank-sum (p-value) and FDR 5% (q-value)
Brain_region	Abbreviation	p value (PPS)	p value (FPR)
Cortical plate	CTXpl'	0.208625	0.710373
Cortical subplate	CTXsp'	0.0378788	0.901515
Striatum	STR'	0.00407925	1
Pallidum	PAL'	0.00407925	0.0378788
Thalamus	'TH'	0.0262238	0.534965
Hypothalamus	'HY'	0.0011655	0.164918
ORB inputs (PPS), using rank-sum (p-value)
Brain_region	Abbreviation	p value (PPS)	p value (FPR)
Somatomotor areas	MO	0.6857	0.2
Anterior cingulate area	ACA	1	0.1143
Prelimbic area	PL	0.8857	0.8857
Infralimbic area	ILA	0.1143	0.8857
Orbital area	ORB	0.1143
Agranular insular area	AI	0.0286	0.6857
Dorsal peduncular area	DP	0.6571	0.9143
Hippocampal formation	HIP	0.0857	0.6857
Ventral group of the dorsal thalamus	VENT	0.8	0.3429
Anterior group of the dorsal thalamus	ATN	0.0286	0.0286
Medial group of the dorsal thalamus	MED	0.0286	0.4857
Midline group of the dorsal thalamus	MTN	0.0286	0.0286
Intralaminar nuclei of the dorsal thalamus	ILM	0.0571	0.2
